# Supplementary material for: Enhancement in the electrochemical performance of zirconium/phosphate bi-functional coatings on LiNi0.8Co0.15Mn0.05O2 by the removal of Li residuals
Source: Royal Society of Chemistry journal article supplement (doi:10.1039/c6cp05286j), 2016-01-01
Supplement: c6cp05286j1.pdf [file c6cp05286j1.pdf]

### Supplementary Information

SI 1. Lattice parameters calculated for the coated NCM samples

| Samples           | Space Group | a (Å) ( $\pm 0.0003$ ) | c (Å) ( $\pm 0.0003$ ) |
|-------------------|-------------|------------------------|------------------------|
| Pristine          |             | 2.86736                | 14.1880                |
| Zr coated NCM     | <i>R-3m</i> | 2.86768                | 14.1933                |
| P coated NCM      |             | 2.86801                | 14.1948                |
| Zr + P coated NCM |             | 2.86883                | 14.1959                |

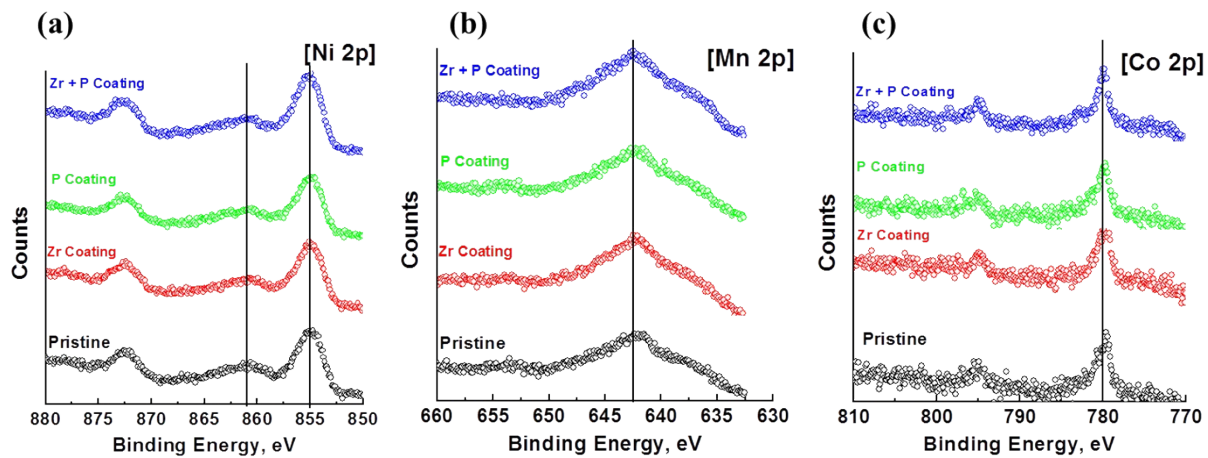

SI 2. XPS spectra of the pristine and surface modified NCM samples at the (a) Ni  $2p$ , (b) Mn  $2p$ , and (c) Co  $2p$  levels

(a)

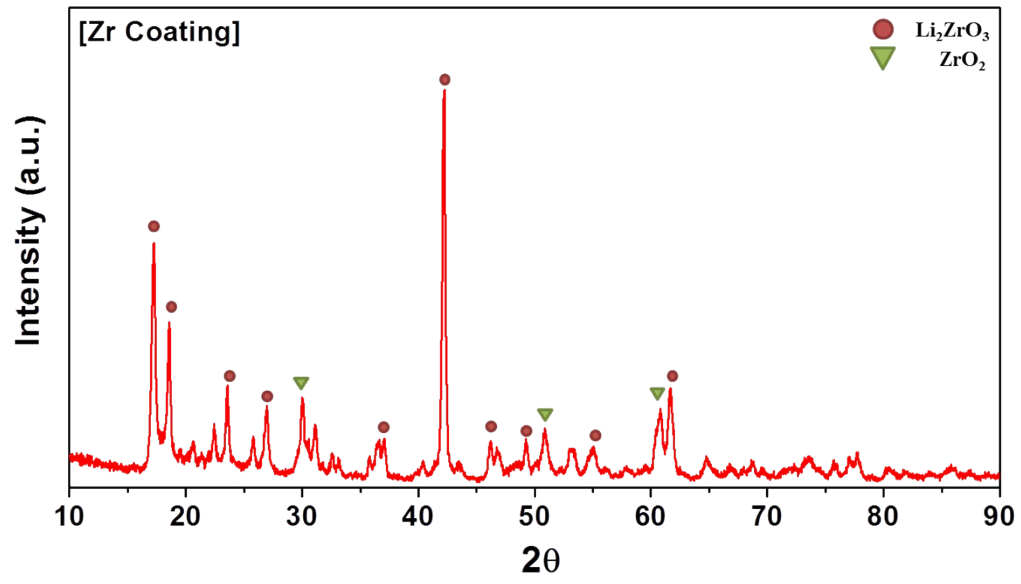

(b)

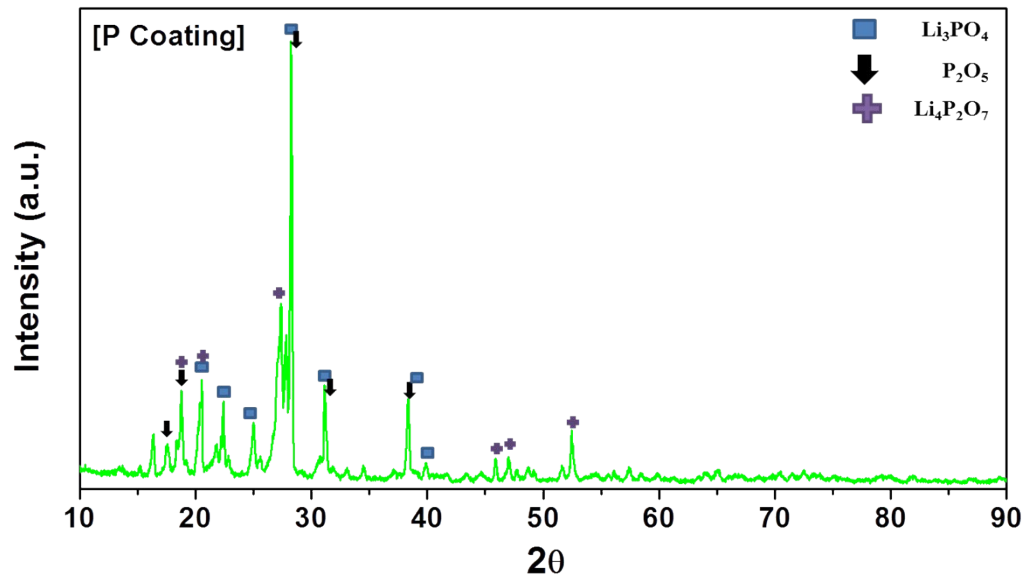

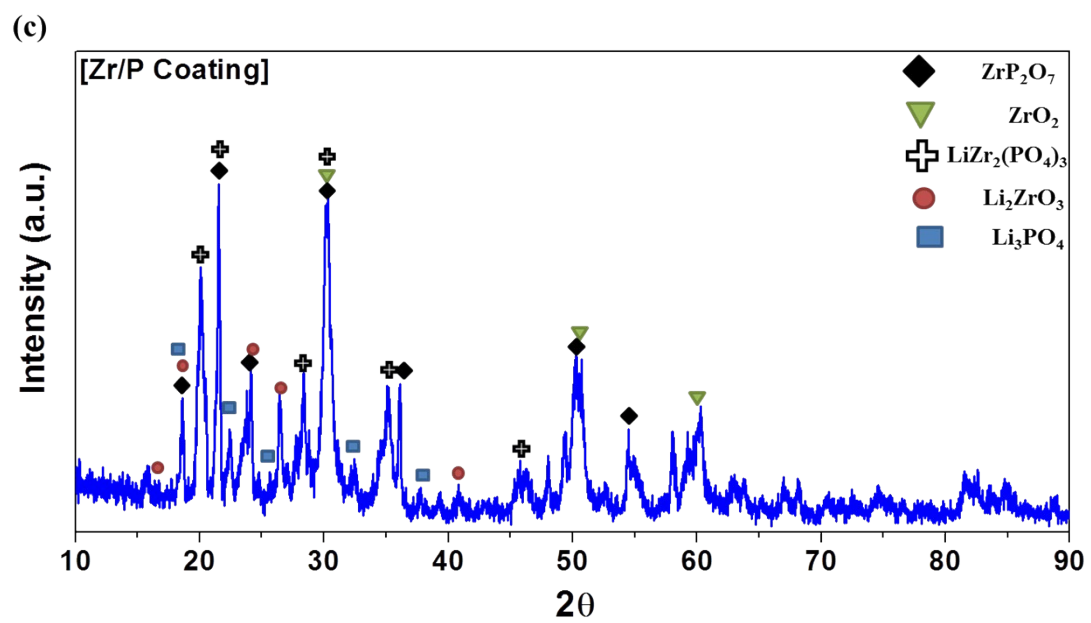

SI 3. XRD pattern of the coating material after heat treatment (a) Zr-only, (b) P-only, and (c) Zr/P coating

#### SI 4. Phase data

| Materials                                         | Formation Energy<br>(eV/atom) | Space group          |
|---------------------------------------------------|-------------------------------|----------------------|
| Zr                                                | 0.0000                        | P6 <sub>3</sub> /mmc |
| O                                                 | 0.0000                        | n/a                  |
| P                                                 | 0.0000                        | Pm3̄m                |
| N                                                 | 0.0000                        | n/a                  |
| H                                                 | 0.0000                        | n/a                  |
| Li                                                | 0.0000                        | Im3̄m                |
| H <sub>2</sub> O                                  | -1.1718                       | n/a                  |
| Li <sub>2</sub> O                                 | -2.0044                       | Fm3̄m                |
| LiH                                               | -0.4531                       | Fm3̄m                |
| LiOH                                              | -1.7115                       | P4/nmm               |
| CO <sub>2</sub>                                   | -1.4626                       | n/a                  |
| Li <sub>2</sub> CO <sub>3</sub>                   | -2.1171                       | C2/c                 |
| Li <sub>2</sub> O <sub>2</sub>                    | -1.5839                       | P6 <sub>3</sub> /mmc |
| Li <sub>3</sub> P                                 | -0.8273                       | P6 <sub>3</sub> /mmc |
| Li <sub>2</sub> ZrO <sub>3</sub>                  | -3.0087                       | C2/c                 |
| Li <sub>3</sub> PO <sub>4</sub>                   | -2.7098                       | P2 <sub>1</sub> nm   |
| LiOH·H <sub>2</sub> O                             | -1.4470                       | C2/m                 |
| LiP                                               | -0.6871                       | P2 <sub>1</sub> /c   |
| LiPO <sub>3</sub>                                 | -2.5917                       | P2 <sub>1</sub> /c   |
| LiZr <sub>2</sub> (PO <sub>4</sub> ) <sub>3</sub> | -3.0952                       | P2 <sub>1</sub> /c   |
| P <sub>2</sub> O <sub>5</sub>                     | -2.3448                       | F2dd                 |
| H <sub>3</sub> PO <sub>4</sub>                    | -1.7869                       | P2 <sub>1</sub> /c   |
| Zr <sub>2</sub> P <sub>2</sub> O <sub>9</sub>     | -3.2231                       | C2/m                 |
| Zr <sub>3</sub> O                                 | -1.5591                       | P6 <sub>3</sub> 22   |
| Zr <sub>3</sub> P                                 | -0.9350                       | P4 <sub>2</sub> /n   |
| Zr <sub>7</sub> P <sub>4</sub>                    | -1.3098                       | C2/m                 |
| ZrH <sub>2</sub>                                  | -0.6465                       | I4/mmm               |
| ZrO <sub>2</sub>                                  | -3.7676                       | P2 <sub>1</sub> /c   |
| ZrP                                               | -1.5499                       | P6 <sub>3</sub> /mmc |
| ZrC                                               | -1.7466                       | Fm3̄m                |
| ZrP <sub>2</sub>                                  | -1.0841                       | Pmnb                 |
| ZrP <sub>2</sub> O <sub>7</sub>                   | -3.0298                       | Pa3̄                 |
| ZrN                                               | -1.8985                       | Fm3̄m                |
| LiP <sub>7</sub>                                  | -0.1792                       | I4 <sub>1</sub> /acd |
| NO <sub>2</sub>                                   | -0.2407                       | n/a                  |
| Li <sub>4</sub> P <sub>2</sub> O <sub>7</sub>     | -2.6563                       | P1̄                  |
| P <sub>2</sub> O <sub>3</sub>                     | -1.7887                       | P2 <sub>1</sub> /m   |
| N <sub>2</sub> O <sub>5</sub>                     | -0.1913                       | P6 <sub>3</sub> /mmc |
| Li <sub>6</sub> Zr <sub>2</sub> O <sub>7</sub>    | -2.8295                       | C2/c                 |
| H <sub>3</sub> NO <sub>4</sub>                    | -0.8263                       | P2 <sub>1</sub> cn   |
| PH <sub>9</sub> N <sub>2</sub> O <sub>4</sub>     | -1.1585                       | P2 <sub>1</sub> /c   |
| LiNO <sub>3</sub>                                 | -1.1164                       | R3̄c                 |

SI 5. Reactions shown in the  $\text{ZrO}_2\text{-LiOH-P}_2\text{O}_5$  phase diagram

S.5.1.  $\text{ZrO}_2\text{-P}_2\text{O}_5$

| Reactant |                |   |   |                        | Product       |   |                                   | dH (eV) |        |
|----------|----------------|---|---|------------------------|---------------|---|-----------------------------------|---------|--------|
| 1        | $\text{ZrO}_2$ | + | 1 | $\text{P}_2\text{O}_5$ | $\rightarrow$ | 1 | $\text{ZrP}_2\text{O}_7$          | =       | -3.046 |
| 2        | $\text{ZrO}_2$ | + | 1 | $\text{P}_2\text{O}_5$ | $\rightarrow$ |   | $\text{Zr}_2\text{P}_2\text{O}_9$ | =       | -3.345 |

S.5.2.  $\text{ZrO}_2\text{-LiOH}$

| Reactant |              |   |   |               | Product       |   |                         | dH (eV) |   |                                      |   |        |
|----------|--------------|---|---|---------------|---------------|---|-------------------------|---------|---|--------------------------------------|---|--------|
| 1        | $\text{ZrO}$ | + | 3 | $\text{LiOH}$ | $\rightarrow$ | 1 | $\text{Li}_2\text{ZrO}$ | +       | 1 | $\text{LiOH}\cdot\text{H}_2\text{O}$ | = | -0.027 |
| 2        |              |   | H |               |               | 3 |                         |         | O |                                      |   |        |

S.5.3.  $\text{P}_2\text{O}_5\text{-LiOH}$

| Reactant |                        |   |   |               | Product       |   |                          | dH (eV) |   |                                      |   |        |
|----------|------------------------|---|---|---------------|---------------|---|--------------------------|---------|---|--------------------------------------|---|--------|
| 1        | $\text{P}_2\text{O}_5$ | + | 6 | $\text{LiOH}$ | $\rightarrow$ | 2 | $\text{Li}_3\text{PO}_4$ | +       | 3 | $\text{H}_2\text{O}$                 | = | -6.681 |
| 1        | $\text{P}_2\text{O}_5$ | + | 3 | $\text{LiOH}$ | $\rightarrow$ | 1 | $\text{Li}_3\text{PO}_4$ | +       | 1 | $\text{H}_3\text{PO}_4$              | = | -4.156 |
| 2        | $\text{P}_2\text{O}_5$ | + | 3 | $\text{LiOH}$ | $\rightarrow$ | 3 | $\text{LiPO}_3$          | +       | 1 | $\text{H}_3\text{PO}_4$              | = | -5.636 |
| 1        | $\text{P}_2\text{O}_5$ | + | 9 | $\text{LiOH}$ | $\rightarrow$ | 2 | $\text{Li}_3\text{PO}_4$ | +       | 3 | $\text{LiOH}\cdot\text{H}_2\text{O}$ | = | -6.778 |

S.5.4.  $\text{ZrO}_2\text{-LiOH-P}_2\text{O}_5$

| Reactant |                |   |   |               | Product |   |                        | dH(eV)        |   |                                |   |   |                      |   |        |
|----------|----------------|---|---|---------------|---------|---|------------------------|---------------|---|--------------------------------|---|---|----------------------|---|--------|
| 4        | $\text{ZrO}_2$ | + | 2 | $\text{LiOH}$ | +       | 3 | $\text{P}_2\text{O}_5$ | $\rightarrow$ | 2 | $\text{LiZr}_2(\text{PO}_4)_3$ | + | 1 | $\text{H}_2\text{O}$ | = | 11.615 |

SI 6. ICP results

| Samples           | Mole ratio, % |       |       |       |
|-------------------|---------------|-------|-------|-------|
|                   | Li            | Ni    | Co    | Mn    |
| Pristine          | 1.06          | 0.050 | 0.148 | 0.802 |
| Zr coated NCM     | 1.06          | 0.050 | 0.148 | 0.802 |
| P coated NCM      | 1.05          | 0.050 | 0.148 | 0.802 |
| Zr + P coated NCM | 1.08          | 0.050 | 0.148 | 0.802 |

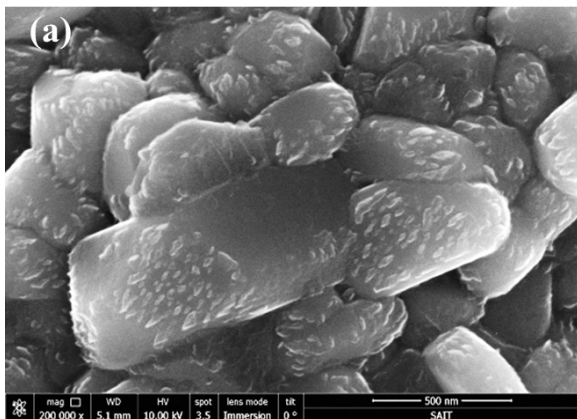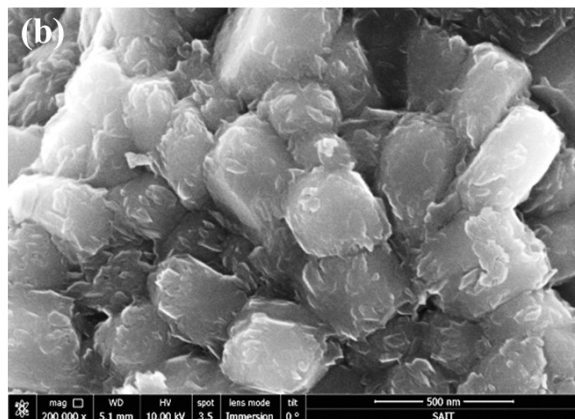

SI 7. SEM images of NCM samples coated with (a)  $\text{LiCoPO}_4$  and (b)  $\text{LiAlPO}_4$



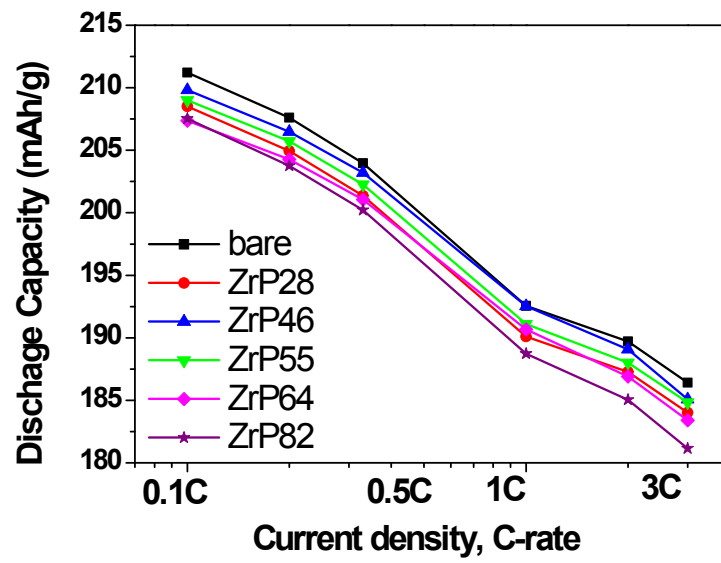

SI 8. Relative rate capabilities of the pristine sample and Zr/P coated NCM samples with various Zr/P ratios.

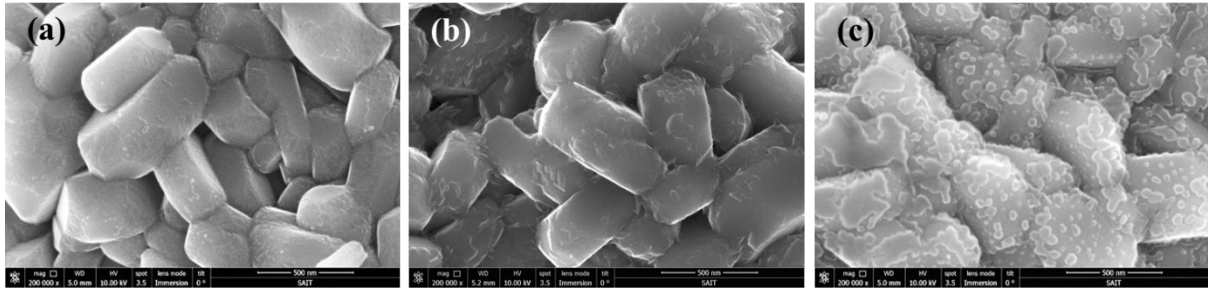

SI 9. . SEM images of the Zr/P coated NCM sample with coating weights of (a) 0.5 wt. %, (b) 1 wt. %, and (c) 2 wt. %.
